# Supplementary material for: Conversion of Organic Matter in Coal by Photocatalytic Oxidation with H2O2 over SFC/TiO2 in Isolated Oxygen System
Source: Hindawi journal article supplement (doi:10.1155/2019/1768351), 2019-10-24
Supplement: f1 [file 1768351.f1.doc]

**Fig.SI1.** Total ion chromatograms of the ASFSFBC, ASFOSFBCI and ASFOSFBCIV.

**Fig.SI2.** Total ion chromatograms of ASFGTC and ASFOGTCI.

**Fig. SI3.** Total ion chromatograms of the ASFSLL, ASFSLLI and ASFSLLIII.

**Fig.SI4.** Total ion chromatograms of the ASFHLGLC and ASFHLGLCI.

**Table SI2.**

Comparison analysis of compounds detected in WEEFOSFBC, WEEFOGTC, WEEFOSLL and WEEFOHLGLC.

| Coal | Sample Mark | Relative content of coal oxidation Extract with ether(%) | | | |
| --- | --- | --- | --- | --- | --- |
| Carbon dioxidate | Acetic acide | Acetate | Heteroatom compound |
| OSFBC | WEEFOSFBCI | 50.4 | 22.1 | 27.5 |  |
| WEEFOSFBCII | 24.7 | 66.0 | 9.3 |  |
| WEEFOSFBCIII | 31.2 | 36.8 | 32.0 |  |
| WEEFOSFBCIV | 29.2 | 30.8 | 40.1 |  |
| OGTC | WEEFOGTI | 65.7 | 20.3 | 11.9 | 2.1 |
| WEEFOGTII | 24.5 | 45.3 | 3.7 | 26.6 |
| WEEFOGTIII | 29.8 | 47.1 | 6.9 | 16.2 |
| WEEFOGTIV | 43.8 | 50.6 | 5.5 |  |
| OSLL | WEEFOSLLI | 91.9 | 4.3 | 3.8 |  |
| WEEFOSLLII | 21.8 | 67.8 | 10.5 |  |
| WEEFOSLLIII | 69.6 | 22.9 | 7.5 |  |
| WEEFOSLLIV | 39.6 | 24.3 | 36.1 |  |
| OHLGLC | WEEFOHLGLCI | 20.8 | 59.4 | 19.8 |  |
| WEEFOHLGLCII | 18.2 | 70.7 | 11.1 |  |
| WEEFOHLGLCIII | 45.0 | 24.7 | 30.2 |  |
| WEEFOHLGLCIV | 22.8 | 40.7 | 32.5 |  |

**Table SI3.**

Extraction efficiency analysis of photocatalytic oxidation coals.

| Coals | EY | EYI | EYII | EYIII | EYIV |
| --- | --- | --- | --- | --- | --- |
| SFBC | 7.3 | 10.6 | 18.0 | 17.0 | 7.9 |
| GTC | 5.7 | 0.1 | 8.8 | 5.5 | 2.7 |
| SLL | 3.3 | 23.4 | 37.4 | 35.0 | 25.8 |
| HLGLC | 5.4 | 24.9 | 32.8 | 54.8 | 45.3 |
